# Supplementary material for: Distinct Whole Transcriptomic Profiles of the Bursa of Fabricius in Muscovy Ducklings Infected by Novel Duck Reovirus with Different Virulence
Source: Viruses. 2022 Dec 30;15(1):111. doi: 10.3390/v15010111 (PMC9866435; doi:10.3390/v15010111)
Supplement: Supplementary file 1 [file viruses-15-00111-s001.zip › Table S1.xlsx]

## Sheet: Sheet1
Table S1 The basic information of transcriptomic sequencing data
Sample	control_1	control_2	control_3	HN10_1	HN10_2	HN10_3	JDm10_1	JDm10_2	JDm10_3
Raw Data (Read)	86046870	86359640	83821166	90740126	88137786	90291022	83809404	87440428	86683046
Raw Data (Base)	12.91G	12.95G	12.57G	13.61G	13.22G	13.54G	12.57G	13.12G	13.00G
Valid Data (Read)	59622032	60472146	58389412	61372814	60214148	59107672	58077152	58221266	57789662
Valid Data (Base)	8.94G	9.07G	8.76G	9.21G	9.03G	8.87G	8.71G	8.73G	8.67G
Valid Ratio(reads)	69.29	70.02	69.66	67.64	68.32	65.46	69.3	66.58	66.67
Q20%	99.91	99.9	99.9	99.9	99.9	99.89	99.87	99.85	99.88
Q30%	90.03	89.66	89.66	89.58	89.38	90.22	86.87	86.94	87.73
GC content%	50	49.5	50	50	49.5	51	49.5	50	51
Mapped reads	0.5104	0.5038	0.5047	0.5077	0.5085	0.5128	0.4871	0.4904	0.495
Unique Mapped reads	0.2684	0.266	0.2646	0.267	0.2675	0.2681	0.2582	0.2574	0.2565
Multi Mapped reads	0.242	0.2378	0.2401	0.2406	0.241	0.2446	0.2289	0.233	0.2385
PE Mapped reads	0.3771	0.3692	0.3707	0.3734	0.3735	0.3814	0.3451	0.3486	0.3577
Reads map to sense strand	0.2382	0.2368	0.2356	0.2374	0.2387	0.2388	0.2289	0.2298	0.2302
Reads map to antisense strand	0.2415	0.2398	0.2388	0.2401	0.2412	0.2421	0.2316	0.2325	0.2332
Non-splice reads	0.3613	0.3616	0.3585	0.3565	0.3606	0.3581	0.3503	0.3464	0.3476
Splice reads	0.1184	0.115	0.1159	0.121	0.1193	0.1228	0.1101	0.116	0.1158

## Sheet: Sheet2
control_1	59622032	30431405(51.04%)	16001942(26.84%)	14429463(24.20%)	22480926(37.71%)	14203311(23.82%)	14398133(24.15%)	21539851(36.13%)	7061593(11.84%)
control_2	60472146	30464641(50.38%)	16085466(26.60%)	14379175(23.78%)	22324066(36.92%)	14319149(23.68%)	14499505(23.98%)	21864666(36.16%)	6953988(11.50%)
control_3	58389412	29469647(50.47%)	15449141(26.46%)	14020506(24.01%)	21642384(37.07%)	13754935(23.56%)	13944720(23.88%)	20934357(35.85%)	6765298(11.59%)
HN10_1	61372814	31156051(50.77%)	16387627(26.70%)	14768424(24.06%)	22915986(37.34%)	14569557(23.74%)	14737131(24.01%)	21882109(35.65%)	7424579(12.10%)
HN10_2	60214148	30619511(50.85%)	16108035(26.75%)	14511476(24.10%)	22489428(37.35%)	14375335(23.87%)	14524180(24.12%)	21715977(36.06%)	7183538(11.93%)
HN10_3	59107672	30308212(51.28%)	15847898(26.81%)	14460314(24.46%)	22545264(38.14%)	14117441(23.88%)	14307621(24.21%)	21166308(35.81%)	7258754(12.28%)
JDm10_1	58077152	28291302(48.71%)	14994806(25.82%)	13296496(22.89%)	20041404(34.51%)	13291515(22.89%)	13451903(23.16%)	20347291(35.03%)	6396127(11.01%)
JDm10_2	58221266	28554263(49.04%)	14988573(25.74%)	13565690(23.30%)	20297176(34.86%)	13381969(22.98%)	13535873(23.25%)	20165465(34.64%)	6752377(11.60%)
JDm10_3	57789662	28608369(49.50%)	14822828(25.65%)	13785541(23.85%)	20673788(35.77%)	13306022(23.02%)	13474032(23.32%)	20088004(34.76%)	6692050(11.58%)
Sample	Valid reads	Mapped reads	Unique Mapped reads	Multi Mapped reads	PE Mapped reads	Reads map to sense strand	Reads map to antisense strand	Non-splice reads	Splice reads
control_1	control_2	control_3	HN10_1	HN10_2	HN10_3	JDm10_1	JDm10_2	JDm10_3	Sample
59622032	60472146	58389412	61372814	60214148	59107672	58077152	58221266	57789662	Valid reads
30431405(51.04%)	30464641(50.38%)	29469647(50.47%)	31156051(50.77%)	30619511(50.85%)	30308212(51.28%)	28291302(48.71%)	28554263(49.04%)	28608369(49.50%)	Mapped reads
16001942(26.84%)	16085466(26.60%)	15449141(26.46%)	16387627(26.70%)	16108035(26.75%)	15847898(26.81%)	14994806(25.82%)	14988573(25.74%)	14822828(25.65%)	Unique Mapped reads
14429463(24.20%)	14379175(23.78%)	14020506(24.01%)	14768424(24.06%)	14511476(24.10%)	14460314(24.46%)	13296496(22.89%)	13565690(23.30%)	13785541(23.85%)	Multi Mapped reads
22480926(37.71%)	22324066(36.92%)	21642384(37.07%)	22915986(37.34%)	22489428(37.35%)	22545264(38.14%)	20041404(34.51%)	20297176(34.86%)	20673788(35.77%)	PE Mapped reads
14203311(23.82%)	14319149(23.68%)	13754935(23.56%)	14569557(23.74%)	14375335(23.87%)	14117441(23.88%)	13291515(22.89%)	13381969(22.98%)	13306022(23.02%)	Reads map to sense strand
14398133(24.15%)	14499505(23.98%)	13944720(23.88%)	14737131(24.01%)	14524180(24.12%)	14307621(24.21%)	13451903(23.16%)	13535873(23.25%)	13474032(23.32%)	Reads map to antisense strand
21539851(36.13%)	21864666(36.16%)	20934357(35.85%)	21882109(35.65%)	21715977(36.06%)	21166308(35.81%)	20347291(35.03%)	20165465(34.64%)	20088004(34.76%)	Non-splice reads
7061593(11.84%)	6953988(11.50%)	6765298(11.59%)	7424579(12.10%)	7183538(11.93%)	7258754(12.28%)	6396127(11.01%)	6752377(11.60%)	6692050(11.58%)	Splice reads
