# Supplementary material for: Distinct Whole Transcriptomic Profiles of the Bursa of Fabricius in Muscovy Ducklings Infected by Novel Duck Reovirus with Different Virulence
Source: Viruses. 2022 Dec 30;15(1):111. doi: 10.3390/v15010111 (PMC9866435; doi:10.3390/v15010111)
Supplement: Supplementary file 1 [file viruses-15-00111-s001.zip › Table S2.xlsx]

## Sheet: Sheet1
Table S2 ceRNA network between the differentially expressed miRNAs of duckling and transcripts of NDRV
miRNA ID	Tot Score	Tot Energy	Align Len	miRNA Identity	Target Identity	miRNA Seq	miRNA Start	miRNA End	NDRV vs NC	Target Seq	Target Start	Target End	Region
miR-24	144	-20.89	19	68.42%	73.68%	GGCTCAGTTCAGCAGGAACA	2	21	Up	AGGAGTTCCTTCAATCCTGGGCCT	680	703	HN10-L1
miR-26a-5p	143	-20.79	20	75.00%	85.00%	TCAAGTAATCCAGGATAGGCT	2	22	Up	CAGTCTATTCTGAATACTCGAA	8582	8603	HN10-L3
miR-24	143	-23.66	24	66.67%	75.00%	GGCTCAGTTCAGCAGGAACAG	2	22	Up	GTATGATCCTGAAATGGCAGCTGAGTCC	9007	9034	HN10-L3
miR-181a-1-3p	142	-22.74	25	64.00%	76.00%	CCATCGACCGTTGATTGTAC	2	21	Down	TTTACGATCACGCGCTCACGTTGATGGA	10215	10242	HN10-L3
miR-146b-5p	149	-22.71	20	75.00%	85.00%	GAGAACTGAATTCCATAGGCG	2	22	Up	CGGGGCTAGGAGTTGGTTCTCG	11729	11750	HN10-M1
miR-146a-5p	143	-21.43	18	72.22%	88.89%	GAGAACTGAATTCCATGGG	2	20	Down	GGGGCTAGGAGTTGGTTCTCG	11730	11750	HN10-M1
miR-30c-1-3p	143	-21.57	19	68.42%	84.21%	GGAGAGGATTGTTTACGCC	3	21	Down	ACGAGTAACTGCGTCCTCTCCGC	12310	12332	HN10-M1
let-7e-5p	141	-20.24	20	70.00%	80.00%	GAGGTAGTAGGTTGTATAGTT	2	22	Up	GAACAGAACATCCTGCTACGTCC	13336	13358	HN10-M1
let-7i-5p	140	-20.45	19	73.68%	78.95%	GAGGTAGTAGTTTGTGCTGT	2	21	Down	AACAGAACATCCTGCTACGTCC	13337	13358	HN10-M1
miR-1329-5p	167	-25.63	24	75.00%	79.17%	ACAGTGATCAGGTTATGATGG	2	22	Up	ATTATCATTATTCCTGAAATCACTGTT	13440	13466	HN10-M1
miR-23a-3p	141	-23.21	16	81.25%	87.50%	TCACATTGCCAGGGATT	2	18	Up	CCTCTGTCCCTGGGAACGTGAT	14562	14583	HN10-M2
miR-16-2-3p	141	-20.75	18	77.78%	88.89%	CCAATATTATTGTGCTGCT	2	20	Down	CTGCAGCGCAGATTATTGGT	15251	15270	HN10-M2
miR-30c-1-3p	155	-22.05	20	65.00%	80.00%	GGGAGAGGATTGTTTACGCC	2	21	Down	AAGCCTTGGCAGCCGCTCTCCCG	15581	15603	HN10-M2
miR-449c-5p	152	-20.56	25	64.00%	72.00%	GGCAGTGCCTGTTAGCTGGCTG	2	23	Up	AGATCTGTCTACAACAACGTCACTGCCA	15946	15973	HN10-M2
miR-7-1-3p	140	-23.59	17	82.35%	88.24%	AACAAATCACAGTCTGC	2	18	Down	TTTCCCAGGCTGTGGAATTGTTG	16396	16418	HN10-M3
miR-30c-1-3p	146	-21.24	9	88.89%	100.00%	GGGAGAGGAT	2	11	Down	CCTTTGGTGTTCTTCTCTCCCT	17073	17094	HN10-M3
miR-30e	145	-27.51	19	73.68%	89.47%	TTCAGTCGGATGTTTGCAGC	3	22	Down	GATCTGCGAACGTAAGGCTGAATG	17920	17943	HN10-M3
miR-205-5p	152	-21.48	23	60.87%	73.91%	CCTTCATTCCACCGGAGTCTG	2	22	Up	TCGGTTTCTCTTGGACAGATGAAGGT	19990	20015	HN10-S2
let-7e-5p	146	-22.23	22	68.18%	81.82%	GAGGTAGTAGGTTGTATAGTT	2	22	Up	ACACTGTTAACGGCTTCTACTTCG	20407	20430	HN10-S2
miR-199a-3p	141	-25.88	17	82.35%	94.12%	AGTAGTCTGCACATTGGT	3	20	Up	AACCGAGTGCAGATTACTCA	20490	20509	HN10-S2
miR-30e	144	-24.66	21	66.67%	76.19%	TTTCAGTCGGATGTTTGCAGCA	2	23	Down	GTGCTCGTTCTCCCGACTGGAAC	20530	20552	HN10-S2
miR-212-3p	157	-20.69	20	70.00%	85.00%	AACAGTCTACAGTCATGGC	2	20	Up	CGGATCATGATGTCGAGGACTGTTG	21785	21809	HN10-S3
miR-132a-5p	151	-20.48	19	73.68%	89.47%	CGTGGCTTTAGATTGTTAC	3	21	Up	GCTGACGGTCGTAATGCCACGAA	22352	22374	HN10-S4
miR-125-5p	148	-20.74	20	75.00%	80.00%	CCTGAGACCCTAACTTGTGA	3	22	Up	AGCCGCTCGTCTAGTGTCTCAGGTT	22573	22597	HN10-S4
let-7c	148	-22.53	19	63.16%	84.21%	GAGGTAGTAGATTGTATGGT	2	21	Down	ACCGGTCCGATTGACTATCTCG	22730	22751	HN10-S4
let-7l-5p	156	-26.72	19	63.16%	94.74%	GAGGTAGTCGGTTGTATTGT	2	21	Down	ACCGGTCCGATTGACTATCTCG	22730	22751	HN10-S4
miR-200a	140	-21.57	21	71.43%	80.95%	AACACTGTCTGGTAACGATGT	2	22	Down	AACGTCCTTGCTCAGCCAGCGTTA	2602	2625	JDm10-L1
miR-196b	146	-29.68	23	65.22%	91.30%	GGTAGTTTCATGTTGTTGGGTA	3	24	Up	CAACCTAGCGGCGAATGAGGCTACCAT	2910	2936	JDm10-L1
miR-196b	140	-20.6	21	61.90%	90.48%	AGGTAGTTTCATGTTGTTGGGT	2	23	Up	TTCCTCAACATATCGGACTGCTTG	8396	8419	JDm10-L3
miR-146b-5p	140	-22.02	19	68.42%	84.21%	GAGAACTGAATTCCATAGGC	2	21	Up	GATCCTGAGATATTCGGTTTTCG	10163	10185	JDm10-L3
miR-146b-5p	147	-21.72	18	77.78%	88.89%	GAGAACTGAATTCCATAGG	2	20	Up	GGTGCTAGGAGTTGGTTCTCG	11729	11749	JDm10-M1
miR-30c-2-3p	148	-20.85	15	73.33%	93.33%	TGGGAGAAGGCTGTTT	2	17	Down	AACTCTACTGGCCTTCTTCCAA	14250	14271	JDm10-M2
miR-489-3p	147	-20.81	20	70.00%	80.00%	GACATCATATGTACGGCTGC	2	21	Down	AGCAGACGGGCAGCATGATGTTT	15118	15140	JDm10-M2
miR-1454	148	-22.78	25	68.00%	76.00%	TACAGTGATGAGACTTTGGCTC	2	23	Up	ATAGCTCAAGTGGCTGAAGTCACTGTGC	15270	15297	JDm10-M2
miR-30c-2-3p	145	-20.04	18	72.22%	83.33%	TGGGAGAAGGCTGTTTACT	2	20	Down	CACGTGAAGACCATCTCCTAG	17586	17606	JDm10-M3
miR-33-3p	149	-23.59	18	72.22%	88.89%	AATGTTTCTGCAGTGCAGT	2	20	Down	TATTGCACACGGAAATATTG	18222	18241	JDm10-S1
miR-145-5p	159	-25.65	22	63.64%	72.73%	TCCAGTTTTCCCAGGAATCCCTA	2	24	Up	GGGGGCAGGCTATGGATAACTGGAC	20442	20466	JDm10-S2
PC-5p-16192	142	-23.05	16	75.00%	87.50%	GGTGAGGCGAGGAGG	2	16	Down	ATGACTTCTCGAACCTCATCC	20796	20816	JDm10-S2
miR-460a-3p	165	-20.58	20	80.00%	85.00%	ACAGCGCATACAATGTGGA	2	20	Up	TTCCCATACTTGTCTCGCGCTGTC	22390	22413	JDm10-S4
PC-5p-16192	159	-26.93	16	81.25%	87.50%	GGTGAGGCGAGGAGGGT	2	18	Down	ACTCGTCCTCCCTCACCA	22538	22555	JDm10-S4
