# Supplementary figures and images for: Distinct Whole Transcriptomic Profiles of the Bursa of Fabricius in Muscovy Ducklings Infected by Novel Duck Reovirus with Different Virulence
Source: MDPI journal article supplement (doi:10.3390/v15010111), 2022-12-30

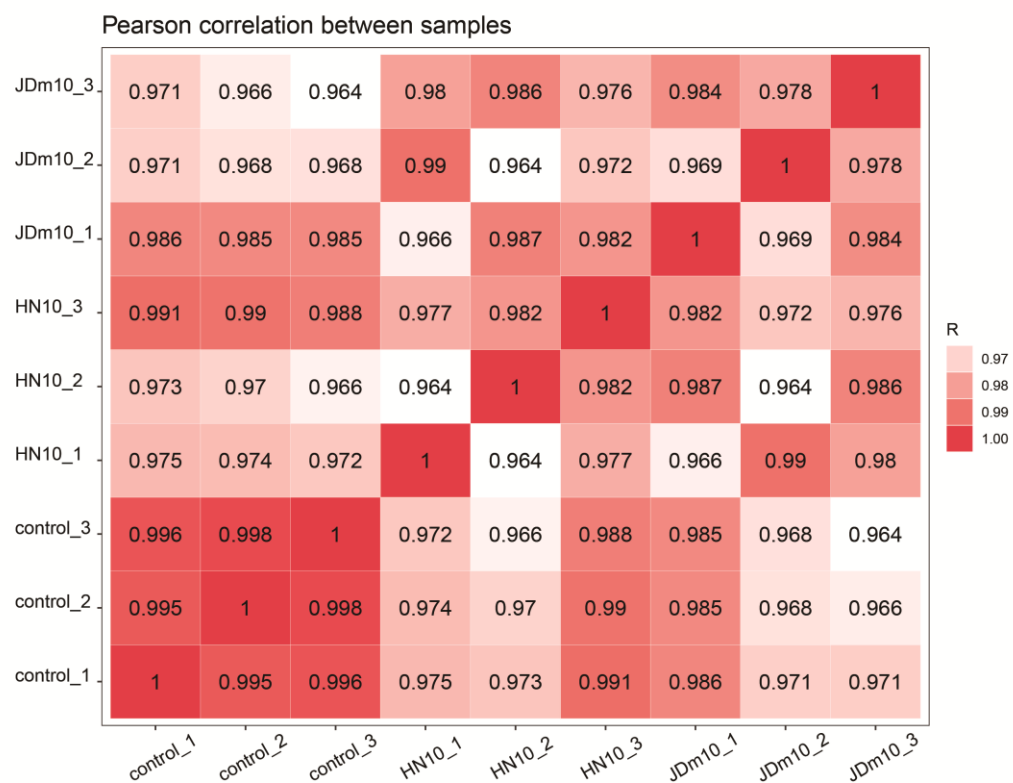

Figure S1: Pearson correlation among the duplicate samples of each group of RNA-seq

Supplement: s1 [file s1]
